# Supplementary material
Source: PubMed Central journal article supplement (PMC10330833)
Supplement: NIHMS1905333-supplement-1.pdf [file NIHMS1905333-supplement-1.pdf]

**Appendix:****Data:****Statistical analysis:**

The following variables were considered in the multi-variable analysis for the four outcomes:

Inpatient Mortality: Age, Male Sex, Portal Vein Thrombosis, Diabetes, Hypertension, Hyperlipidemia, Prior Variceal Bleed, Prior HE, Prior Ascites, Prior Large Volume Paracentesis, Prior Hydrothorax, Prior AKI, Prior Hepatorenal Syndrome, Prior AKI, Prior Hepatorenal Syndrome, Prior Hyponatremia, Prior HCC, Prior Transplant Listing, Hospitalized in the Past 6mos, Infections in the Prior 6mos, Admission Betablockers, Admission Lactulose, Admission Rifaximin, Admission Diuretics, Admission Statins, Admission SBP Prophylaxis, Admission Antivirals for hepatitis B, Infections at Admission or within the first 48 Hours, Liver Related Admission, Admission MELD-Na, Alcohol-related etiology, Viral etiology, World Bank Income Group

30-Day Mortality: Age, Male Sex, Portal Vein Thrombosis, Diabetes, Hypertension, Hyperlipidemia, Prior Variceal Bleed, Prior HE, Prior Ascites, Prior Large Volume Paracentesis, Prior Hydrothorax, Prior AKI, Prior Hepatorenal Syndrome, Prior AKI, Prior Hepatorenal Syndrome, Prior Hyponatremia, Prior HCC, Prior Transplant Listing, Hospitalized in the Past 6mos, Infections in the Prior 6mos, Admission Betablockers, Admission Lactulose, Admission Rifaximin, Admission Diuretics, Admission Statins, Admission SBP Prophylaxis, Admission Antivirals for hepatitis B, Infections at Admission or within the first 48 Hours, Liver Related Admission, Nosocomial Infections, Discharge MELD-Na, Hospital AKI, ICU Transfer, Brain Failure, Respiratory Failure, Circulatory Failure, Alcohol-related etiology, Viral etiology, World Bank Income Group

In-Hospital Transplant: Age, Male Sex, Portal Vein Thrombosis, Diabetes, Hypertension, Hyperlipidemia, Prior Variceal Bleed, Prior HE, Prior Ascites, Prior Large Volume Paracentesis, Prior Hydrothorax, Prior AKI, Prior Hepatorenal Syndrome, Prior AKI, Prior Hepatorenal Syndrome, Prior Hyponatremia, Prior HCC, Prior Transplant Listing, Hospitalized in the Past 6mos, Infections in the Prior 6mos, Admission Betablockers, Admission Lactulose, Admission Rifaximin, Admission Diuretics, Admission Statins, Admission SBP Prophylaxis, Admission Antivirals for hepatitis B, Infections at Admission or within the first 48 Hours, Liver Related Admission, Admission MELD-Na, Alcohol-related etiology, Viral etiology, World Bank Income Group

30-Day Transplant: Age, Male Sex, Portal Vein Thrombosis, Diabetes, Hypertension, Hyperlipidemia, Prior Variceal Bleed, Prior HE, Prior Ascites, Prior Large Volume Paracentesis, Prior Hydrothorax, Prior AKI, Prior Hepatorenal Syndrome, Prior AKI, Prior Hepatorenal Syndrome, Prior Hyponatremia, Prior HCC, Prior Transplant Listing, Hospitalized in the Past 6mos, Infections in the Prior 6mos, Admission Betablockers, Admission Lactulose, Admission Rifaximin, Admission Diuretics, Admission Statins, Admission SBP Prophylaxis, Admission Antivirals for hepatitis B, Infections at Admission or within the first 48 Hours, Liver Related

Admission, Discharge MELD-Na, Alcohol-related etiology, Viral etiology, World Bank Income Group

**Linearity assumption testing:**

The linearity assumption was assessed by dividing the continuous variables (Age, MELD-Na) into five groups and then fit with these groups as categorical variables (factors). The resulting parameter estimates for the parameter estimates were then plotted to see if they appeared to be linear. In addition, a likelihood ratio test was performed to assess if the variables could be treated as linear as opposed to categorical; the resulting likelihood ratio test indicated that the simpler model (continuous as opposed to categorical) was preferred. Finally, the Hosmer-Lemeshow test did not indicate any lack of fit and thus no additional complexity to the model was need. Given these multiple assessments of the linearity assumption, we were confident that the models are linear in the log-odds as required by the model.

**Definitions of Kidney dysfunction:**

Stage 2: Increase in serum creatinine  $\geq 2.0$ -3.0 times from baseline

Stage 3: Increase in serum creatinine  $\geq 3.0$  times from baseline OR Serum creatinine 4.0mg/dl with an acute increase of 0.3 mg/dl OR Initiation of renal replacement therapy

**Stage of Hepatic Encephalopathy according to West-Haven criteria:**

Stage 1: Changes in behavior with minimal change in level of consciousness

Stage 2: Gross disorientation, drowsiness, possibly asterixis, inappropriate behavior

Stage 3: Marked confusion, incoherent speech, sleeping most of the time but arousable to vocal stimuli

Stage 4: Comatose, unresponsive to pain; decorticate or decerebrate posturing

**Definitions of Infections:**

(a) spontaneous bacteremia: positive blood cultures without a source of infection, (b) SBP: ascitic fluid polymorphonuclear cells  $>250/\mu\text{L}$  with/without a positive fluid culture, (c) lower respiratory tract infections: new pulmonary infiltrate in the presence of: (i) at least one respiratory symptom (cough, sputum production, dyspnea, pleuritic pain) with (ii) at least one finding on auscultation (rales or crepitation) or one sign of infection (core body temperature  $>38^\circ\text{C}$  or  $<36^\circ\text{C}$ , shivering or leucocyte count  $>10,000/\text{mm}^3$  or  $<4,000/\text{mm}^3$ ) in the absence of antibiotics, (d) *Clostridium difficile*: diarrhea with a positive *C. difficile* assay (e) bacterial entero-colitis: diarrhea or dysentery with a positive stool culture for *Salmonella*, *Shigella*, *Yersinia*, *Campylobacter*, or pathogenic *E. coli*, (f) skin infection: fever with cellulitis, (g) urinary tract infection (UTI): urine WBC  $>15/\text{high power field}$  with either positive urine gram stain or culture in a symptomatic patient, (h) intra-abdominal infections: diverticulitis, appendicitis, cholangitis, etc., (i) secondary bacterial peritonitis:  $>250$  polymorphonuclear cells/ $\mu\text{L}$  of ascitic fluid in the presence of an intra-abdominal source of peritonitis and multiple organisms cultured from ascitic fluid.

**Table S1: C.L.E.A.R.E.D. Collaborators, Affiliations, and Email addresses**

| <b>C.L.E.A.R.E.D. Collaborators, Affiliations, and Email addresses</b> |                                                                             |                                            |
|------------------------------------------------------------------------|-----------------------------------------------------------------------------|--------------------------------------------|
| <b>Author Name</b>                                                     | <b>Author Affiliation</b>                                                   | <b>Author Email</b>                        |
| Shiv K Sarin                                                           | Institute of Liver and Biliary Sciences, Delhi                              | shivsarin@gmail.com                        |
| Shiva Kumar                                                            | Cleveland Clinic Abu Dhabi                                                  | kumars5@clevelandclinicabudhabi.ae         |
| Sebastián Marciano                                                     | Hospital Italiano de Buenos Aires, Argentina                                | sebastian.marciano@hospitalitaliano.org.ar |
| Adrián Gadano                                                          | Hospital Italiano de Buenos Aires, Argentina                                | adrian.gadano@hospitalitaliano.org.ar      |
| Fiona Tudehope                                                         | Westmead Hospital, Sydney                                                   | fiona.tudehope@health.nsw.gov.au           |
| Robert Gibson                                                          | John Hunter Hospital, Newcastle                                             | robert.gibson@health.nsw.gov.au            |
| Alexander Prudence                                                     | John Hunter Hospital, Newcastle                                             | Alexander.Prudence@health.nsw.gov.au       |
| Adam Doyle                                                             | Royal Perth Hospital, Perth                                                 | Adam.Doyle@health.wa.gov.au                |
| Hooi Ling Si                                                           | Royal Perth Hospital, Perth                                                 | hooi.si@health.wa.gov.au                   |
| Stephen Riordan                                                        | Prince of Wales Hospital, Sydney                                            | Stephen.Riordan@health.nsw.gov.au          |
| Alberto Farias                                                         | Hospital das Clínicas da Faculdade de Medicina da Universidade de São Paulo | albertoqfarias@gmail.com                   |
| Patricia Zitelli                                                       | Hospital das Clínicas da Faculdade de Medicina da Universidade de São Paulo | patricia.momoyo@hc.fm.usp.br               |
| Chinmay Bera                                                           | University of Toronto                                                       | chinmay.bera@uhn.ca                        |
| Nabiha Faisal                                                          | University of Manitoba, Winnipeg                                            | Nabiha.Faisal@umanitoba.ca                 |
| Puneeta Tandon                                                         | University of Alberta, Edmonton                                             | ptandon@ualberta.ca                        |
| Monica Dahiya                                                          | University of Alberta, Edmonton                                             | mdahiya@ualberta.ca                        |
| Marie Jeanne Lohoues                                                   | CHU de Cocody, Abidjan, Cote d'Ivoire                                       | lohoueskouacoumj@gmail.com                 |
| Ponan Claude Regis Lah                                                 | CHU de Cocody, Abidjan, Cote d'Ivoire                                       | clauderegis146@gmail.com                   |
| Carlos Benítez                                                         | Pontificia Catholic University of Chile, Santiago                           | benitezc@gmail.com                         |
| Marco Arrese                                                           | Pontificia Catholic University of Chile, Santiago                           | marrese@uc.cl                              |
| Yongchao Xian                                                          | The Third People's Hospital of Guilin                                       | xianyongchao0901@163.com                   |
| Jin Guan                                                               | The Third People's Hospital of Guilin                                       | 11845839@qq.com                            |
| Chuanwu Zhu                                                            | The Fifth People's Hospital of Suzhou                                       | zhuchw@126.com                             |
| Yingling Wang                                                          | The Fifth People's Hospital of Suzhou                                       | 306823363@163.com                          |
| Minghua Su                                                             | The First Affiliated Hospital of Guangxi Medical University                 | smh9292@163.com                            |
| Man Su                                                                 | The First Affiliated Hospital of Guangxi Medical University                 | 493541173@qq.com                           |
| Yanhang Gao                                                            | The First Hospital of Jilin University                                      | 15804303019@163.com                        |
| Xinrui Wang                                                            | The First Hospital of Jilin University                                      | xinrui_9@126.com                           |

| <b>C.L.E.A.R.E.D. Collaborators, Affiliations, and Email addresses</b> |                                                                                       |                                  |
|------------------------------------------------------------------------|---------------------------------------------------------------------------------------|----------------------------------|
| <b>Author Name</b>                                                     | <b>Author Affiliation</b>                                                             | <b>Author Email</b>              |
| Yongfang Jiang                                                         | The Second XiangYa Hospital of Central South University                               | jiangyongfang@csu.edu.cn         |
| Feng Peng                                                              | The Second XiangYa Hospital of Central South University                               | pf6034@csu.edu.cn                |
| Caiyan Zhao                                                            | The Third Affiliated Hospital of Hebei Medical University                             | zhaocy2005@163.com               |
| Wei Wang                                                               | The Third Affiliated Hospital of Hebei Medical University                             | wangwei_1211@126.com             |
| Lei Wang                                                               | Second Hospital of Shandong University                                                | wlcrb@sdu.edu.cn                 |
| Dedong Yin                                                             | Second Hospital of Shandong University                                                | 2574797886@qq.com                |
| Mingqin Lu                                                             | The First Affiliated Hospital of Wenzhou Medical University                           | lmq0906@163.com                  |
| Yijing Cai                                                             | The First Affiliated Hospital of Wenzhou Medical University                           | caiyijing007@163.com             |
| Ningping Zhang                                                         | Zhongshan Hospital, Fudan University                                                  | zhang.ningping@zs-hospital.sh.cn |
| Wanqin Zhang                                                           | Zhongshan Hospital, Fudan University                                                  | zhang.wanqin1@zs-hospital.sh.cn  |
| Hai Li                                                                 | School of Medicine, Ren Ji Hospital, Shanghai Jiao Tong University                    | haili_17@126.com                 |
| Fuchen Dong                                                            | School of Medicine, Ren Ji Hospital, Shanghai Jiao Tong University                    | dongfuchen66@163.com             |
| Xin Zheng                                                              | Union Hospital, Tongji Medical College, Huazhong University of Science and Technology | xin11@hotmail.com                |
| Jing Liu                                                               | Union Hospital, Tongji Medical College, Huazhong University of Science and Technology | jingliu_21@hust.edu.cn           |
| Hong Tang                                                              | Center of Infectious Disease, West China Hospital of Sichuan University               | htang6198@hotmail.com            |
| Libo Yan                                                               | Center of Infectious Disease, West China Hospital of Sichuan University               | yanlibo725@aliyun.com            |
| Bin Xu                                                                 | Beijing Youan Hospital, Capital Medical University                                    | xubin1016@126.com                |
| Linlin Wei                                                             | Beijing Youan Hospital, Capital Medical University                                    | llmm0830@126.com                 |
| Zhiliang Gao                                                           | The Third Affiliated Hospital of Sun Yat-sen University, Guangzhou                    | gaozhl@mail.sysu.edu.cn          |
| Zhen Xu                                                                | The Third Affiliated Hospital of Sun Yat-sen University, Guangzhou                    | chilamxu@hotmail.com             |
| Minghua Lin                                                            | Mengchao Hepatobiliary Hospital of Fujian Medical University                          | lmh543@163.com                   |
| Haibin Gao                                                             | Mengchao Hepatobiliary Hospital of Fujian Medical University                          | gaohb605@163.com                 |
| Jinjun Chen                                                            | Nanfang Hospital, Southern Medical University                                         | chjj@smu.edu.cn                  |
| Beiling Li                                                             | Nanfang Hospital, Southern Medical University                                         | lbling123@163.com                |

| <b>C.L.E.A.R.E.D. Collaborators, Affiliations, and Email addresses</b> |                                                                                                                                                                                                                                                                    |                                        |
|------------------------------------------------------------------------|--------------------------------------------------------------------------------------------------------------------------------------------------------------------------------------------------------------------------------------------------------------------|----------------------------------------|
| <b>Author Name</b>                                                     | <b>Author Affiliation</b>                                                                                                                                                                                                                                          | <b>Author Email</b>                    |
| Chenghai Liu                                                           | Shuguang Hospital Affiliated to Shanghai University of Traditional Chinese Medicine                                                                                                                                                                                | chenghailiu@hotmail.com                |
| Yanyun Zhang                                                           | Shuguang Hospital Affiliated to Shanghai University of Traditional Chinese Medicine                                                                                                                                                                                | m15159804011@163.com                   |
| Peng Hu                                                                | Second Affiliated Hospital of Chongqing Medical University                                                                                                                                                                                                         | hp_cq@163.com                          |
| Huan Deng                                                              | Second Affiliated Hospital of Chongqing Medical University                                                                                                                                                                                                         | denghuan_537@126.com                   |
| Hibat Allah Belimi                                                     | Mustapha Bacha University Hospital, Algiers                                                                                                                                                                                                                        | hib-2009@live.fr                       |
| Nabil Debzi                                                            | Mustapha Bacha University Hospital, Algiers                                                                                                                                                                                                                        | nabildebzi@yahoo.fr                    |
| Henok Fisseha                                                          | St Paul's Hospital Millennium Medical College, Addis Ababa, Ethiopia                                                                                                                                                                                               | henok_fisseha@yahoo.com                |
| Aloysious D Aravinthan                                                 | NIHR Nottingham Biomedical Research Centre, Nottingham University Hospitals NHS Trust and University of Nottingham, Nottingham.<br>Nottingham Digestive Diseases Centre, Translational Medical Sciences, School of Medicine, University of Nottingham, Nottingham. | aloyious.aravinthan@nottingham.ac.uk   |
| Suresh Vasan Venkatachalapathy                                         | NIHR Nottingham Biomedical Research Centre, Nottingham University Hospitals NHS Trust and University of Nottingham, Nottingham.                                                                                                                                    | suresh.venkatachalapathy@nhu.nhs.uk    |
| Neil Rajoriya                                                          | Queen Elizabeth University Hospitals, Birmingham                                                                                                                                                                                                                   | neil.Rajoriya@uhb.nhs.uk               |
| Rosemary Faulkes                                                       | Queen Elizabeth University Hospitals, Birmingham                                                                                                                                                                                                                   | rosemary.Faulkes@uhb.nhs.uk            |
| Damien Leith                                                           | Glasgow Royal Infirmary                                                                                                                                                                                                                                            | damien.Leith@ggc.scot.nhs.uk           |
| Ewan Forrest                                                           | Glasgow Royal Infirmary                                                                                                                                                                                                                                            | ewan.Forrest@ggc.scot.nhs.uk           |
| Adebayo Danielle                                                       | Royal Berkshire Hospital                                                                                                                                                                                                                                           | danielle.Adebayo@royalberkshire.nhs.uk |
| James Kennedy                                                          | Royal Berkshire Hospital                                                                                                                                                                                                                                           | james.Kennedy@royalberkshire.nhs.uk    |
| Diana Yung                                                             | Royal Infirmary of Edinburgh                                                                                                                                                                                                                                       | diana.yung@nhslothian.scot.nhs.uk      |
| Wai-Kay Seto                                                           | School of Clinical Medicine, The University of Hong Kong                                                                                                                                                                                                           | wkseto@hku.hk                          |
| James Fung                                                             | School of Clinical Medicine, The University of Hong Kong                                                                                                                                                                                                           | jfung@gastro.hk                        |
| Helena Katchman                                                        | Tel-Aviv Sourasky Medical Center, Tel Aviv, Israel                                                                                                                                                                                                                 | helenak@tlvmc.gov.il                   |
| Liane Rabinowich                                                       | Tel-Aviv Sourasky Medical Center, Tel Aviv, Israel                                                                                                                                                                                                                 | lianer@tlvmc.gov.il                    |
| Aabha Nagral                                                           | Jaslok Hospital, Mumbai and Apollo Hospital, Navi Mumbai                                                                                                                                                                                                           | aabhanagral@gmail.com                  |

| <b>C.L.E.A.R.E.D. Collaborators, Affiliations, and Email addresses</b> |                                                                                    |                                    |
|------------------------------------------------------------------------|------------------------------------------------------------------------------------|------------------------------------|
| <b>Author Name</b>                                                     | <b>Author Affiliation</b>                                                          | <b>Author Email</b>                |
| Ajay Jhaveri                                                           | Jaslok Hospital, Mumbai                                                            | ajayjhaveri@gmail.com              |
| Anand Kulkarni                                                         | Asian institute of Gastroenterology, Hyderabad                                     | anandvk90@gmail.com                |
| Mithun Sharma                                                          | Asian institute of Gastroenterology, Hyderabad                                     | drmithunsharma@gmail.com           |
| C E Eapen                                                              | Christian Medical College, Vellore                                                 | eapen@cmcvellore.ac.in             |
| Ashish Goel                                                            | Christian Medical College, Vellore                                                 | drashishgoel@cmcvellore.ac.in      |
| Akash Gandotra                                                         | PGIMER, Chandigarh                                                                 | akkigandotra4@gmail.com            |
| Ajay Duseja                                                            | PGIMER, Chandigarh                                                                 | ajayduseja@yahoo.co.in             |
| Anoop Saraya                                                           | AIIMS, New Delhi                                                                   | ansaraya@yahoo.com                 |
| Jatin Yegurla                                                          | AIIMS, New Delhi                                                                   | drjatin.y@gmail.com                |
| Mohamed Rela                                                           | Dr. Rela Institute and Medical Centre, Chennai                                     | mohamedrela@gmail.com              |
| Dinesh Jothimani                                                       | Dr. Rela Institute and Medical Centre, Chennai                                     | dinesh.jothimani@relainstitute.com |
| Anil Arora                                                             | Sir Ganga Ram Hospital, Delhi                                                      | anilarora@sgrh.com                 |
| Ashish Kumar                                                           | Sir Ganga Ram Hospital, Delhi                                                      | ashishk10@yahoo.com                |
| R K Dhiman                                                             | Sanjay Gandhi Postgraduate Institute of Medical Sciences, Lucknow                  | rkpsdhiman@gmail.com               |
| Akash Roy                                                              | Sanjay Gandhi Postgraduate Institute of Medical Sciences, Lucknow                  | royakash12@gmail.com               |
| Anil C Anand                                                           | KIMS, Bhubaneswar, Odisha                                                          | ac.anand@kims.ac.in                |
| Dibyalochan Praharaj                                                   | KIMS, Bhubaneswar, Odisha                                                          | dibyalochan.praharaj@kims.ac.in    |
| Sarai Gonzalez Hueso                                                   | Centro Médico ISSEMYM                                                              | saraigh69@yahoo.com                |
| Araceli Bravo Cabrera                                                  | Centro Médico ISSEMYM                                                              | chelybrca@gmail.com                |
| José Luis Pérez Hernández                                              | Hospital General de Mexico "Dr. Eduardo Liceaga"                                   | josluiperez@hotmail.com            |
| Oscar Morales Gutierrez                                                | Hospital General de Mexico "Dr. Eduardo Liceaga"                                   | droscarmorales@hotmail.com         |
| Godolfino Miranda Zazueta                                              | Instituto Nacional de Ciencias Médicas y Nutrición "Salvador Zubirán", Mexico City | godomiranda25@gmail.com            |
| Abraham Ramos-Pineda                                                   | Instituto Nacional de Ciencias Médicas y Nutrición "Salvador Zubirán", Mexico City | dr.abrahamramos@gmail.com          |
| Mauricio Castillo Barradas                                             | Centro Médico la Raza, Mexico City                                                 | mcbarradas@hotmail.com             |
| Rene Male Velazquez                                                    | Instituto de la Salud Digestiva, Guadalajara                                       | renemale@gmail.com                 |
| Lilian Torres Made                                                     | Instituto de la Salud Digestiva, Guadalajara                                       | liliantorresmade@yahoo.com         |
| José Antonio Velarde-Ruiz Velasco                                      | Hospital Civil de Guadalajara Fray Antonio Alcalde, Guadalajara                    | velardemd@yahoo.com.mx             |

| <b>C.L.E.A.R.E.D. Collaborators, Affiliations, and Email addresses</b> |                                                                                      |                                  |
|------------------------------------------------------------------------|--------------------------------------------------------------------------------------|----------------------------------|
| <b>Author Name</b>                                                     | <b>Author Affiliation</b>                                                            | <b>Author Email</b>              |
| Francisco Félix-Tellez                                                 | Hospital Civil de Guadalajara Fray Antonio Alcalde, Guadalajara                      | ftellezmd@gmail.com              |
| Jacqueline Cordova-Gallardo                                            | Hepatology, Hospital General Dr. Manuel Gea González, Mexico City                    | jacquiemex2@yahoo.com.mx         |
| Ruveena Rajaram                                                        | Universiti of Malaya Medical Centre, Kuala Lumpur, Malaysia                          | drruveena81@gmail.com            |
| Nik Arsyad Nik Muhamad Afendi                                          | Universiti of Malaya, Kuala Lumpur, Malaysia                                         | nik_arsyad@iium.edu.my           |
| Edith N Okeke                                                          | Jos University Teaching Hospital, Jos, Nigeria                                       | edinony@yahoo.com                |
| David P Nyam                                                           | Jos University Teaching Hospital Jos, Nigeria                                        | davidnyampaul@yahoo.com          |
| Dalia Allam                                                            | National Center for Gastrointestinal and Liver Disease, Khartoum                     | daloia2244@yahoo.com             |
| Yashwi Haresh Kumar Patwa                                              | National Center for Gastrointestinal and Liver Disease, Khartoum                     | yhpatwa@gmail.com                |
| Hiang Keat Tan                                                         | Singapore General Hospital                                                           | tan.hiang.keat@singhealth.com.sg |
| Liou Wei Lun                                                           | Singapore General Hospital                                                           | liou.wei.lun@singhealth.com.sg   |
| Sombat Treeprasertsuk                                                  | Chulalongkorn University and King Chulalongkorn Memorial Hospital, Bangkok, Thailand | battan5410@gmail.com             |
| Salisa Wejnaruemarn                                                    | Chulalongkorn University and King Chulalongkorn Memorial Hospital, Bangkok, Thailand | salisa.wej@gmail.com             |
| Busra Haktaniyan                                                       | University of Ankara, School of Medicine, Ankara                                     | busraatmaca13@gmail.com          |
| Feyza Gunduz                                                           | Marmara University School of Medicine, Istanbul                                      | drfgunduz@yahoo.com              |
| Rahmi Aslan                                                            | Marmara University School of Medicine, Istanbul                                      | rahmiaslan@yahoo.com             |
| Abdullah Emre Yildirim                                                 | Gaziantep University School of Medicine, Gaziantep                                   | draemreyildirim@gmail.com        |
| Sezgin Barutcu                                                         | Gaziantep University School of Medicine, Gaziantep                                   | sezginbarutcu@hotmail.com        |
| Zeki Karasu                                                            | Ege University School of Medicine, Izmir                                             | zekikarasu@gmail.com             |
| Alper Uysal                                                            | Ege University School of Medicine, Izmir                                             | alper_uysal@live.com             |
| Enver Ucbilek                                                          | Mersin University School of Medicine, Mersin                                         | enucbilek@hotmail.com            |
| Tolga Kosay                                                            | Mersin University School of Medicine, Mersin                                         | tolgakosay@hotmail.com           |
| Haydar Adanır                                                          | Akdeniz University School of Medicine, Antalya                                       | haydaradanir@hotmail.com         |
| Dinç Dinçer                                                            | Akdeniz University School of Medicine, Antalya                                       | dinc@akdeniz.edu.tr              |
| Somaya Albhaisi                                                        | Virginia Commonwealth University, Richmond                                           | somaya.albhaisi@vcuhealth.org    |
| Sumeet Asrani                                                          | Baylor University Medical Center, Dallas                                             | asrani.sumeet@bswhealth.org      |



| <b>C.L.E.A.R.E.D. Collaborators, Affiliations, and Email addresses</b> |                                          |                                           |
|------------------------------------------------------------------------|------------------------------------------|-------------------------------------------|
| <b>Author Name</b>                                                     | <b>Author Affiliation</b>                | <b>Author Email</b>                       |
| Mohammad Amin Fallahadeh                                               | Baylor University Medical Center, Dallas | aminfa91@gmail.com                        |
| K Rajender Reddy                                                       | University of Pennsylvania               | reddyr@pennmedicine.upenn.edu             |
| Suditi Rahematpura                                                     | University of Pennsylvania               | suditi.rahematpura@pennmedicine.upenn.edu |
| Jawaid Shaw                                                            | Richmond VA Medical Center               | jawaidshaw@gmail.com                      |
| Hugo E Vargas                                                          | Mayo Clinic Scottsdale                   | vargas.hugo@mayo.edu                      |
| David Bayne                                                            | Mayo Clinic Scottsdale                   | bayne.david@mayo.edu                      |
| Scott W Biggins                                                        | University of Washington                 | bigginss@medicine.washington.edu          |
| Natalia Filipek                                                        | University of Washington                 | nfilipek@uw.edu                           |
| Paul Thuluvath                                                         | Mercy Medical Center, Baltimore          | thuluvath@gmail.com                       |
| Somya Sheshadri                                                        | Mercy Medical Centre, Baltimore          | sshesadri@mdmercy.com                     |
| Andrew Keaveny                                                         | Mayo Clinic Jacksonville                 | keaveny.andrew@mayo.edu                   |
| Andres Duarte Rojo                                                     | University of Pittsburgh                 | Andres.Duarte@northwestern.edu            |
| Ricardo Cabello Negrillo                                               | University of Pittsburgh                 | cabellonegrillorj@upmc.edu                |

**Table S2: Center and region-wise breakdown of subjects enrolled**

| Center name                                                                         | Region | Country              | World Bank Classification | Number enrolled |
|-------------------------------------------------------------------------------------|--------|----------------------|---------------------------|-----------------|
| CHU de Cocody                                                                       | Africa | Cote d'Ivoire        | Lower middle income       | 50              |
| Ibn Sina Hospital                                                                   | Africa | Sudan                | Low income                | 33              |
| Jos University                                                                      | Africa | Nigeria              | Lower middle income       | 31              |
| Maputo Central Hospital                                                             | Africa | Mozambique           | Low income                | 3               |
| Mustapha University Hospital                                                        | Africa | Algeria              | Lower middle income       | 50              |
| St. Paul's Hospital Millennium Medical College                                      | Africa | Ethiopia             | Low income                | 49              |
| All India Institute of Medical Sciences                                             | Asia   | India                | Lower middle income       | 50              |
| Apollo Hospitals                                                                    | Asia   | India                | Lower middle income       | 17              |
| Asian Institute of Gastroenterology                                                 | Asia   | India                | Lower middle income       | 50              |
| Beijing Youan Hospital, Capital Medical University                                  | Asia   | China                | Upper middle income       | 50              |
| CMC Vellore                                                                         | Asia   | India                | Lower middle income       | 50              |
| Chongyi Second                                                                      | Asia   | China                | Upper middle income       | 49              |
| Hong Kong University                                                                | Asia   | Hong Kong SAR, China | High Income               | 50              |
| ILBS Hospital Delhi                                                                 | Asia   | India                | Lower middle income       | 33              |
| Jaslok Hospital                                                                     | Asia   | India                | Lower middle income       | 50              |
| KIMS Bhubaneswar                                                                    | Asia   | India                | Lower middle income       | 49              |
| King Chulalongkorn Memorial Hospital                                                | Asia   | Thailand             | Upper middle income       | 49              |
| Mengchao Hepatobiliary Hospital of Fujian Medical University                        | Asia   | China                | Upper middle income       | 50              |
| Nanfang Hospital, Southern Medical University                                       | Asia   | China                | Upper middle income       | 44              |
| PGIMER Chandigarh                                                                   | Asia   | India                | Lower middle income       | 50              |
| Rela Institute                                                                      | Asia   | India                | Lower middle income       | 50              |
| Ren Ji Hospital, Shanghai Jiao Tong University                                      | Asia   | China                | Upper middle income       | 44              |
| Ruijin Hospital                                                                     | Asia   | China                | Upper middle income       | 47              |
| Sanjay Gandhi Post Graduate Institute of Medical Sciences, Lucknow                  | Asia   | India                | Lower middle income       | 50              |
| Second Hospital of Shandong University                                              | Asia   | China                | Upper middle income       | 38              |
| Shuguang Hospital Affiliated to Shanghai University of Traditional Chinese Medicine | Asia   | China                | Upper middle income       | 49              |
| Singapore General                                                                   | Asia   | Singapore            | High income               | 50              |
| Sir Ganga Ram Hospital                                                              | Asia   | India                | Lower middle income       | 49              |

|                                                                                       |             |                      |                     |    |
|---------------------------------------------------------------------------------------|-------------|----------------------|---------------------|----|
| The Fifth People's Hospital of Suzhou                                                 | Asia        | China                | Upper middle income | 50 |
| The First Affiliated Hospital of Guangxi Medical University                           | Asia        | China                | Upper middle income | 48 |
| The First Affiliated Hospital of Wenzhou Medical University                           | Asia        | China                | Upper middle income | 49 |
| The First Hospital of Jilin University                                                | Asia        | China                | Upper middle income | 50 |
| The Second XiangYa Hospital of Central South University                               | Asia        | China                | Upper middle income | 50 |
| The Third Affiliated Hospital of Hebei Medical University                             | Asia        | China                | Upper middle income | 50 |
| The Third Affiliated Hospital of Sun Yat-sen University                               | Asia        | China                | Upper middle income | 36 |
| The Third People's Hospital of Guilin                                                 | Asia        | China                | Upper middle income | 45 |
| Union Hospital, Tongji Medical College, Huazhong University of Science and Technology | Asia        | China                | Upper middle income | 49 |
| University of Malaya Medical Centre                                                   | Asia        | Malaysia             | Upper middle income | 50 |
| West China Hospital of Sichuan University                                             | Asia        | China                | Upper middle income | 43 |
| Zhongshan Hospital, Fudan University                                                  | Asia        | China                | Upper middle income | 46 |
| Glasgow Royal Infirmary                                                               | Europe      | United Kingdom       | High income         | 44 |
| Hippokraton General Hospital, Athens                                                  | Europe      | Greece               | High income         | 8  |
| Nottingham                                                                            | Europe      | United Kingdom       | High income         | 50 |
| Queen Elizabeth Hospital Birmingham                                                   | Europe      | United Kingdom       | High income         | 50 |
| Royal Berkshire Hospital                                                              | Europe      | United Kingdom       | High income         | 50 |
| Royal Infirmary of Edinburgh                                                          | Europe      | United Kingdom       | High income         | 27 |
| UMC Freiburg                                                                          | Europe      | Germany              | High income         | 28 |
| Akdeniz University                                                                    | Middle East | Turkey               | Upper middle income | 50 |
| Cleveland Clinic Abu Dhabi                                                            | Middle East | United Arab Emirates | High income         | 49 |
| Ege University                                                                        | Middle East | Turkey               | Upper middle income | 50 |
| Gaziantep University                                                                  | Middle East | Turkey               | Upper middle income | 43 |
| Marmara University                                                                    | Middle East | Turkey               | Upper middle income | 50 |
| Mersin University                                                                     | Middle East | Turkey               | Upper middle income | 40 |
| Tel Aviv Sourasky Medical Center                                                      | Middle East | Israel               | High income         | 41 |
| Ankara University                                                                     | Middle East | Turkey               | Upper middle income | 48 |

|                                                    |               |               |                     |    |
|----------------------------------------------------|---------------|---------------|---------------------|----|
| Baylor University Medical Center Dallas            | North America | United States | High income         | 50 |
| Centro Medico Nacional La Raza                     | North America | Mexico        | Upper middle income | 50 |
| Centro Mexico                                      | North America | Mexico        | Upper middle income | 50 |
| Columbia University Medical Center                 | North America | United States | High income         | 18 |
| Duke University                                    | North America | United States | High income         | 25 |
| Health Sciences Centre, Manitoba                   | North America | Canada        | High income         | 44 |
| Hospital Civil de Guadalajara Fray Antonio Alcalde | North America | Mexico        | Upper middle income | 50 |
| Hospital General                                   | North America | Mexico        | Upper middle income | 47 |
| Hospital General Dr. Manuel Gea Gonzalez           | North America | Mexico        | Upper middle income | 50 |
| Instituto Nacional                                 | North America | Mexico        | Upper middle income | 50 |
| Instituto de Salud Digestiva                       | North America | Mexico        | Upper middle income | 50 |
| Mayo Clinic - Jacksonville                         | North America | United States | High income         | 50 |
| Mayo Clinic - Scottsdale                           | North America | United States | High income         | 50 |
| Mayo Rochester                                     | North America | United States | High income         | 49 |
| Mercy Medical Center                               | North America | United States | High income         | 49 |
| Richmond VAMC                                      | North America | United States | High income         | 48 |
| University of Toronto                              | North America | Canada        | High income         | 50 |
| University of Alberta                              | North America | Canada        | High income         | 50 |
| University of Pennsylvania                         | North America | United States | High income         | 50 |
| University of Pittsburgh                           | North America | United States | High income         | 50 |
| University of Washington                           | North America | United States | High income         | 50 |
| Virginia Commonwealth University                   | North America | United States | High income         | 50 |
| Prince of Wales Hospital                           | Oceania       | Australia     | High income         | 50 |
| John Hunter Hospital                               | Oceania       | Australia     | High income         | 50 |
| Royal North Shore Hospital                         | Oceania       | Australia     | High income         | 16 |
| Royal Perth Hospital                               | Oceania       | Australia     | High income         | 50 |
| Sir Charles Gairdner Hospital                      | Oceania       | Australia     | High income         | 4  |
| St George Liver Clinic                             | Oceania       | Australia     | High income         | 27 |
| Westmead Hospital                                  | Oceania       | Australia     | High income         | 49 |
| Hospital Britanico de Buenos Aires                 | South America | Argentina     | Upper middle income | 4  |
| Hospital Federal de Bonsucesso                     | South America | Brazil        | Upper middle income | 16 |
| Hospital Italiano                                  | South America | Argentina     | Upper middle income | 50 |

|                                                                             |               |        |                     |    |
|-----------------------------------------------------------------------------|---------------|--------|---------------------|----|
| Hospital das Clínicas da Faculdade de Medicina da Universidade de São Paulo | South America | Brazil | Upper middle income | 50 |
| Hospital de Clinicas de Porto Alegre                                        | South America | Brazil | Upper middle income | 23 |
| Pontificia Universidad Catolica de Chile                                    | South America | Chile  | High income         | 37 |

**Table S3: Reasons for admission depending on country of origin**

|                                   | <b>L/LMIC</b> | <b>UMIC</b> | <b>HIC</b> | <b>p-value</b> |
|-----------------------------------|---------------|-------------|------------|----------------|
| <b>Liver Related Admission</b>    | 94% (672)     | 94% (1653)  | 85% (1202) | <0.0001        |
| Liver Related Reason              |               |             |            |                |
| GI Bleed                          | 34% (227)     | 21% (354)   | 25% (306)  | <0.0001        |
| Hepatic Encephalopathy            | 40% (269)     | 25% (407)   | 32% (380)  | <0.0001        |
| Electrolyte disorders             | 32% (213)     | 18% (293)   | 26% (313)  | <0.0001        |
| Acute kidney injury               | 30% (201)     | 17% (282)   | 29% (349)  | <0.0001        |
| Anasarca                          | 33% (222)     | 41% (672)   | 35% (417)  | 0.0002         |
| HBV Flare                         | 4% (24)       | 2% (192)    | 1% (8)     | <0.0001        |
| Drug-induced liver injury         | 6% (41)       | 2% (30)     | 0% (5)     | <0.0001        |
| <b>Infection Admission</b>        | 26% (188)     | 21% (362)   | 19% (275)  | <0.0001        |
| Spontaneous bacterial peritonitis | 35% (107)     | 28% (151)   | 23% (91)   | 0.0008         |
| Spontaneous Bacteremia            | 8% (24)       | 6% (32)     | 8% (33)    | 0.3220         |
| Respiratory tract infection       | 15% (46)      | 20% (111)   | 14% (57)   | 0.0247         |
| Skin and soft-tissue Infection    | 6% (17)       | 5% (25)     | 8% (33)    | 0.0674         |
| Urinary tract infection           | 14% (43)      | 14% (76)    | 16% (65)   | 0.6263         |
| <i>Clostridioides Difficile</i>   | 0% (0)        | 1% (3)      | 2% (9)     | 0.0059         |
| Bacterial Enterocolitis           | 1% (3)        | 1% (4)      | 1% (3)     | 0.9219         |
| Intra-abdominal Infections        | 2% (5)        | 8% (45)     | 6% (24)    | 0.0005         |
| Fungal Infection                  | 2% (6)        | 1% (4)      | 1% (2)     | 0.1604         |
| Secondary Bacterial Peritonitis   | 1% (2)        | 1% (6)      | 1% (3)     | 0.7971         |
| Procedure-Related Infection       | 1% (3)        | 1% (5)      | 2% (8)     | 0.3102         |
| Other                             | 9% (27)       | 8% (46)     | 14% (55)   | 0.0232         |
| <b>Liver unrelated Admission</b>  | 2% (17)       | 3% (56)     | 10% (147)  | <0.0001        |
| Cardiac                           | 18% (3)       | 7% (4)      | 11% (16)   | 0.4439         |
| Respiratory                       | 6% (1)        | 11% (6)     | 13% (19)   | 0.6659         |
| Psychiatric                       | 0% (0)        | 5% (3)      | 6% (9)     | 0.8938         |
| Orthopedic                        | 6% (1)        | 11% (6)     | 7% (10)    | 0.7113         |

L/LMIC: lower and lower middle income country, UMIC: upper middle income country and HIC: high income country.

**Table S4: Multi-variable analysis for Inpatient and 30-day mortality**

| Inpatient mortality           |         |                      | 30-day Mortality    |         |                      |
|-------------------------------|---------|----------------------|---------------------|---------|----------------------|
| Variable                      | p-value | OR (95% CI)          | Variable            | p-value | OR (95% CI)          |
| Age                           | <0.0001 | 1.02<br>(1.01, 1.03) | Age                 | <0.0001 | 1.04<br>(1.03, 1.05) |
| Prior HCC                     | 0.0111  | 1.86<br>(1.16, 3.00) | Prior Ascites       | 0.0039  | 1.57<br>(1.16, 2.12) |
| Transplant Listing            | 0.0104  | 0.61<br>(0.41, 0.89) | Prior HCC           | 0.0136  | 1.94<br>(1.15, 3.27) |
| Prior 6 Month Hospitalization | 0.0066  | 0.70<br>(0.54, 0.91) | Transplant Listing  | 0.0041  | 0.52<br>(0.33, 0.81) |
| Prior 6 Month Infections      | 0.0174  | 1.43<br>(1.07, 1.92) | Admission Rifaximin | 0.0177  | 0.69<br>(0.51, 0.94) |
| Admission Lactulose           | 0.0008  | 1.56<br>(1.20, 2.02) | Infection Admission | 0.0028  | 1.51<br>(1.15, 1.97) |
| Admission Diuretics           | 0.0385  | 0.78<br>(0.61, 0.99) | Discharge MELD-Na   | <0.0001 | 1.18<br>(1.16, 1.20) |
| Admission SBP Prophylaxis     | 0.0047  | 0.61<br>(0.43, 0.86) | Hospital AKI        | <0.0001 | 2.07<br>(1.56, 2.76) |
| Admission HBV Antivirals      | 0.0001  | 0.46<br>(0.31, 0.68) | Grade 3-4 HE        | <0.0001 | 2.52<br>(1.80, 3.54) |
| Infection Admission           | <0.0001 | 2.38<br>(1.89, 3.01) | Ventilation         | <0.0001 | 3.60<br>(2.36, 5.48) |
| MELD-Na admission             | <0.0001 | 1.14<br>(1.12, 1.15) | Vasopressor use     | <0.0001 | 3.38<br>(2.32, 4.91) |
| World Bank Group              | <0.0001 |                      | World Bank Group    | <0.0001 |                      |
| LMIC vs High                  |         | 2.54<br>(1.82, 3.54) | LMIC vs High        |         | 1.84<br>(1.24, 2.72) |
| UMIC vs High                  |         | 2.14<br>(1.61, 2.84) | UMIC vs High        |         | 1.95<br>(1.44, 2.65) |

L/LMIC: lower and lower middle income country, UMIC: upper middle income country and HIC: high income country, HCC: hepatocellular cancer, AKI: acute kidney injury, HE: hepatic encephalopathy, SBP: spontaneous bacterial peritonitis, MELD-Na: model for end-stage liver disease sodium

**Table S5: Multi-variable analysis for Inpatient and 30-day liver transplant**

| Inpatient Liver Transplant                 |         |                                        | 30-day Liver Transplant                    |         |                                        |
|--------------------------------------------|---------|----------------------------------------|--------------------------------------------|---------|----------------------------------------|
| Variable                                   | p-value | OR (95% CI)                            | Variable                                   | p-value | OR (95% CI)                            |
| Transplant Listing                         | <0.0001 | 10.01 (6.29, 15.94)                    | Age                                        | <0.0001 | 0.97 (0.95, 0.98)                      |
| Hepatorenal Syndrome                       | 0.0096  | 2.09 (1.20, 3.65)                      | Transplant Listing                         | <0.0001 | 8.40 (5.88, 12.01)                     |
| Admission Lactulose                        | 0.0319  | 1.75 (1.05, 2.91)                      | Hepatorenal Syndrome                       | <0.0001 | 2.83 (1.76, 4.55)                      |
| MELD-Na                                    | <0.0001 | 1.15 (1.11, 1.19)                      | Prior Hyponatremia                         | <0.0001 | 2.64 (1.84, 3.80)                      |
| Diabetes                                   | 0.0224  | 1.77 (1.08, 2.89)                      | Prior Ascites                              | 0.0058  | 2.11 (1.24, 3.58)                      |
| Age                                        | 0.0299  | 0.98 (0.96, 1.00)                      | Admission Lactulose                        | 0.0004  | 2.01 (1.37, 2.94)                      |
|                                            |         |                                        | Liver Related Admission                    | 0.0289  | 2.21 (1.09, 4.51)                      |
| World Bank Group LMIC vs High UMIC vs High | <0.0001 | 0.21 (0.10, 0.41)<br>0.41 (0.24, 0.69) | World Bank Group LMIC vs High UMIC vs High | <0.0001 | 0.21 (0.11, 0.40)<br>0.58 (0.39, 0.85) |

L/LMIC: lower and lower middle income country, UMIC: upper middle income country and HIC: high income country, MELD-Na: model for end-stage liver disease sodium



# CLEARED Site Characterization Survey 1

Please complete the survey below to help us characterize your site ([site\_id] [site\_name]). Answer this for the general patient population you encounter in your practice, \*not\* the specific patients enrolled in the CLEARED project.

Thank you!

---

What percentage of your patients have health insurance?  0-25%,  
 26-50%  
 51-75%  
 76-100%

---

What is the most prominent type of insurance at your site?  National insurance  
 Private  
 Military or Veteran  
 Other

---

Other type of insurance: \_\_\_\_\_

---

Is liver transplantation available in your hospital?  Yes  
 No

---

Is liver transplantation available in your country?  Yes  
 No

---

What percentage of your patients can afford to pay for liver transplantation?  0-25%,  
 26-50%  
 51-75%  
 76-100%

---

Is there a medical ICU in your hospital?  Yes  
 No

---

How many beds are in your hospital's ICU? \_\_\_\_\_

---

What percentage of your patients can afford to pay for ICU care?  0-25%,  
 26-50%  
 51-75%  
 76-100%

---

Does your hospital offer emergency (nighttime and weekend) upper GI endoscopy for patients with GI hemorrhage?  Yes  
 No

---

What percentage of your patients forgo medically indicated tests and/or treatments for financial reasons?  0-25%,  
 26-50%  
 51-75%  
 76-100%

---

Do you have rifaximin in your country?  Yes  
 No

---

What percentage of your patients can afford to pay for rifaximin?

0-25%,  
 26-50%  
 51-75%  
 76-100%

---

Do you have terlipressin in your country?

Yes  
 No

---

What percentage of your patients can afford to pay for terlipressin?

0-25%,  
 26-50%  
 51-75%  
 76-100%

---

Do you have somatostatin or octreotide in your country?

Yes  
 No

---

What percentage of your patients can afford to pay for somatostatin or octreotide?

0-25%,  
 26-50%  
 51-75%  
 76-100%

---

What percentage of your patients can afford to pay for IV albumin?

0-25%,  
 26-50%  
 51-75%  
 76-100%

---

Is there a hospice or palliative care program available to your patients?

Yes  
 No

---

What percentage of your patients can afford to pay for hospice/palliative care?

0-25%,  
 26-50%  
 51-75%  
 76-100%



**Chronic Liver disease Evolution And Registry for Event and Decompensation  
(CLEARED) Global Study of Liver Disease Outcomes in Inpatients**

**PIs: Jasmohan Bajaj and Ashok Choudhury**

Multiple sites in USA, India, China, Canada, Brazil, Mexico, Turkey, Korea and others

**Protocol Date: 18 Mar 2021**

**Steering Committee:**

USA: Jasmohan Bajaj, Richmond, USA

India: Ashok Choudhury, Delhi, India

Canada, Asia, and Continental Europe: Florence Wong, Toronto, Canada

China: Qing Xie, Shanghai, China

Mexico: Aldo Torre, Mexico City, Mexico

South America: Mario Reis, Porto Alegre, Brazil

Turkey: Ramazan Idilman, Ankara, Turkey

Korea: Dong Joon Kim, Seoul, Korea

Australia: Jacob George, Sydney, Australia

Africa and Middle East: Mark Topazian and Hailemichael Desalegn, Ethiopia and  
Patrick Kamath, Mayo Clinic, USA

United Kingdom – Dr. Peter Hayes, Edinburgh

## **Background**

There is a need to determine the predictors of complications and mortality in patients with chronic liver disease worldwide. Currently several definitions of ACLF that do not cross-reference with each other are being used. This has hindered the development of uniform diagnostic criteria and reduced the ability to generalize findings. Patients with chronic liver disease (F3 or higher, or FIB-4 > 1.45 <https://www.hepatitisc.uw.edu/page/clinical-calculators/fib-4>) and cirrhosis both need to be evaluated for 30-day and 90-day outcomes with precipitation based on hepatic or extrahepatic insults. These patients will need to be followed for inpatient, at 30-day and at 90-day outcomes, including complications which need to be differentiated from the precipitants that brought the patients in to the hospital. The goal is to define parameters of mortality, infections, organ failures and complications agnostic of currently available definitions such as APASL, EASL-CLIF, NASCELD or Chinese Society of Hepatology or other national societies.

## **Overarching objective**

Determine predictors of inpatient mortality and other complications in patients with cirrhosis agnostic of pre-formed definitions of ACLF around the world.

## **Population**

Multi-center study across ~100 sites worldwide.

## **Subject characteristics**

Inpatients with chronic liver disease and/or cirrhosis.

### **Inclusion criteria:**

1. Cirrhosis
2. Admitted for non-elective reasons
3. Age >18 years
4. Able to consent or have a legal representative who can consent.

### **Exclusion criteria:**

1. Acute liver failure

2. Unable to consent
3. Admitted electively
4. Life expectancy <48 hours
5. Prisoners
6. HCC without loco-regional control for >6 months or patients on systemic therapy for HCC currently
7. COVID-19 diagnosis confirmed during the current admission
8. Post-TIPS if TIPS is >6 months prior
9. Known recent MI (<6 months) or stroke with residual defects

### **DATA COLLECTION**

Following ethics approval, consecutive eligible subjects with cirrhosis (maximum 50 per site), presenting to inpatient wards at each participating institution, will be approached for participation in the study. Consent will be obtained from the patient or the legally authorized representative if the patient is unable to consent (hepatic encephalopathy, intubated etc.) as per local regulations. After consent is signed, the rest of the data will be collected through chart review. Medical records will be reviewed for the details during the hospitalization until day 30 and day 90 (optional) from the date of hospital discharge. For practical purposes, the 30 and 90 days will start from the date of discharge from the current hospital (regardless of whether transferred from another hospital).

All data will be entered in a de-identified excel sheet and data captured will include the following data:

- Demographics (age, sex, etiology of cirrhosis, years since diagnosis of cirrhosis made)
- Degree of liver dysfunction (Child-Pugh, MELD-Na for those with cirrhosis, FIB-4 values), renal function, electrolytes
- Current admission –does patient have compensated or decompensated cirrhosis,
- Compensated / decompensated cirrhosis based on data within 6 months of this admission.

- If decompensated, form(s) of decompensation (ascites, hydrothorax, variceal bleed, hepatic encephalopathy, coagulopathy) and other complications (Spontaneous bacterial peritonitis (SBP), Hepato-renal syndrome) and HCC
- Whether the current episode of decompensation is the index episode or subsequent episode; if subsequent episode, the time period between the two episodes of decompensation.
- Current medications and reason for initiation for rifaximin, beta-blockers, statins, and acid suppressive agents
- Vitals signs and lab values on admission
- Details of infections including site, type, organism, antibiotic used, number of infections, length of stay, ICU stay and outcomes and details of other complications of cirrhosis
- If transplant happened, time to liver transplant
- 90-day outcome (if alive, transplanted, in a hospice, or deceased)

Confirmed infections: those with the following characteristics:

1. **Spontaneous bacteremia:** *positive blood cultures* in the absence of any recognized source of infection
2. **Spontaneous Bacterial Peritonitis (SBP):** Ascitic fluid polymorphonuclear cells  $>250/ml$  with or without positive fluid bacterial cultures;
3. **Spontaneous bacterial empyema:** Pleural fluid polymorphonuclear cells  $>250/ml$  with or without positive fluid bacterial cultures or gram stain;
4. **Pneumonia**
  - A. Radiographically confirmed pneumonia on CXR or CT scan AND
  - B. Presence of:
    - i. At least 1 respiratory symptom (cough, sputum production, dyspnea, tachypnea, pleuritic pain) with
    - ii. At least 1 finding on auscultation (rales or crepitation) or 1 sign of infection (core body temperature  $>38^{\circ}C$ , shivering or leucocyte count  $>10,000/mm^3$  or  $<4,000/mm^3$ ) in the absence of antibiotics.

5. **Bacterial entero-colitis:** diarrhea or dysentery with a positive stool culture for Salmonella / Shigella / Yersinia/ Campylobacter/ pathogenic E. coli.
6. **Urinary tract infection:** Urine WBC count >15 cells per high-power field, symptoms and positive urine culture
7. **Clostridium difficile diarrhea:** diarrhea with a positive C. difficile assay
8. **Skin infection:** Fever and cellulitis associated with leukocytosis
9. **Procedure related infections**
10. **Other infections** (e.g. cholangitis, diverticulitis) will be diagnosed according to clinical, radiological, and bacteriologic data

### **Primary Endpoint**

Mortality at 30 days after discharge.

### **Secondary Endpoints**

1. Complications during hospitalizations
2. ICU transfer
3. Transplantation or withdrawal from candidacy
4. Organ failures
5. Infections (at baseline, nosocomial infections, second infections) and their organisms
6. Mortality at 90 days after discharge (optional to be determined by site PI)

### **Risks**

This is an observational study that has a low degree of risk. Potential risk include the following:

- Privacy and Confidentiality: Minor risk of breach of confidentiality

### **Risk Reduction**

All study data and will be stored without identifiers in a secure (locked) location and only authorized study personnel will have access to study records. Only de-identified data will be sent for combined analysis.



### **Monitoring & Reporting of Adverse Events**

This is an observational and data collection study. Subjects do not receive treatment for any medical condition as part of this study and none of the outcomes over 30 days will be considered adverse or serious adverse events.

### **Subject Compensation**

Participants will not be paid for their participation in the study.

### **Data Collection**

Data collection sheets are attached and detail study data to be collected. The professionally managed Microsoft OneDrive implementation at the VCU Health System will be used for data collection and movement, providing encryption in transit and at rest. Data collected for the central data repository will be de-identified, minimizing the risk to participants. No personal information will be stored or revealed between sites. Data access will be limited per individual using the principle of least privilege, in accordance with steering committee guidance.

### **Risk/Benefit Assessment**

Patients with cirrhosis are at a high risk of mortality, especially due to infections and other complications. Currently there are imperfect strategies for predicting their occurrence and outcomes. There are several recent retrospective studies suggesting that in addition to the severity of liver disease, medication use (acid suppression, beta-blockers and rifaximin) can be significant factors in either predisposing or protecting cirrhotic subjects from infections. This multi-center data collection study is planned to answer these questions prospectively as part of a natural history of mortality and other negative outcomes in cirrhosis. This will lend a unique insight into the role of these medications in the occurrence of infections and will also allow design intervention trials in the future

### **Data Analysis Plan**

Descriptive statistics will be applied to all parameters collected. Subjects will be divided into those with and without beta-blockers, acid suppressive and

rifaximin, statin use at the time of admission and they will be compared to those who were not on those medications. We will compare the determinants of transplant-free survival and death at 30 days based on complications, precipitants (including infections) and their management in the entire group as well as evaluating regional variations in survival. The results of the subjects will be compared using ANOVA for continuous variables, and Chi square test for nominal variables. Subjects who receive a transplant will be censored. A p value of  $<0.05$  will be regarded as statistically significant. Comparisons will be done between:

- A. Compensated cirrhosis vs re-compensated vs. decompensated cirrhosis prior to hospitalization
- B. Extra-hepatic precipitant vs intra-hepatic precipitant
- C. Infected versus not on admission versus development (on admission vs. nosocomial vs. second infection)
